# Supplementary material for: Photostability of the deprotonated forms of the UV filters homosalate and octyl salicylate: molecular dissociation versus electron detachment following UV excitation
Source: Royal Society of Chemistry journal article supplement (doi:10.1039/d2cp01612e), 2022-01-01
Supplement: d2cp01612e1.pdf [file d2cp01612e1.pdf]

1

## SUPPORTING INFORMATION

2

### 3 **Photostability of the Deprotonated Forms of the UV Filters Homosalate and Octyl Salicylate:** 4 **Does Dissociation Compete with Electron Detachment Following UV Excitation?**

5

6 **Natalie G. K. Wong, Conor D. Rankine, Cate S. Anstöter and Caroline E. H. Dessent\***

7 Department of Chemistry, University of York, Heslington, YO10 5DD, U. K.

8

\* E-mail: [caroline.dessent@york.ac.uk](mailto:caroline.dessent@york.ac.uk)

9

10

11

#### 12 **Supporting Information:**

13 **S1. Photodepletion Laser Power Dependence Measurements**

14 **S2. Optimized Cartesian Coordinate Tables**

15 **S3. Schematic Structure of the [HS-H]<sup>-</sup> and [OS-H]<sup>-</sup> Chromophore**

## 16 S1. Laser Power Dependence Measurements

17 Laser power measurements were conducted on [HS-H]<sup>-</sup> and [OS-H]<sup>-</sup> at their respective absorption  
18 maxima of 3.31 and 5.69 eV. The plots displayed in Figure S1 are that of the parent ion photodepletion  
19 intensities ( $\text{Int}_{\text{OFF}} - \text{Int}_{\text{ON}}$ ) at such photon energies. Following standard protocol, such data has been  
20 plotted and fit to a power function. The resultant slope is thereby proportional to the number of absorbed  
21 photons implicated in this experiment. Multiphoton events *via* instantaneous absorption of multiple  
22 photons in the Franck-Condon region are negligible as the laser beam is only softly focused through the  
23 ion trap region. The slopes at all four photon energies measure at less than 1, confirming that  
24 photodepletion of [HS-H]<sup>-</sup> and [OS-H]<sup>-</sup> at 0.3 mJ are evidently not multiphoton in nature.

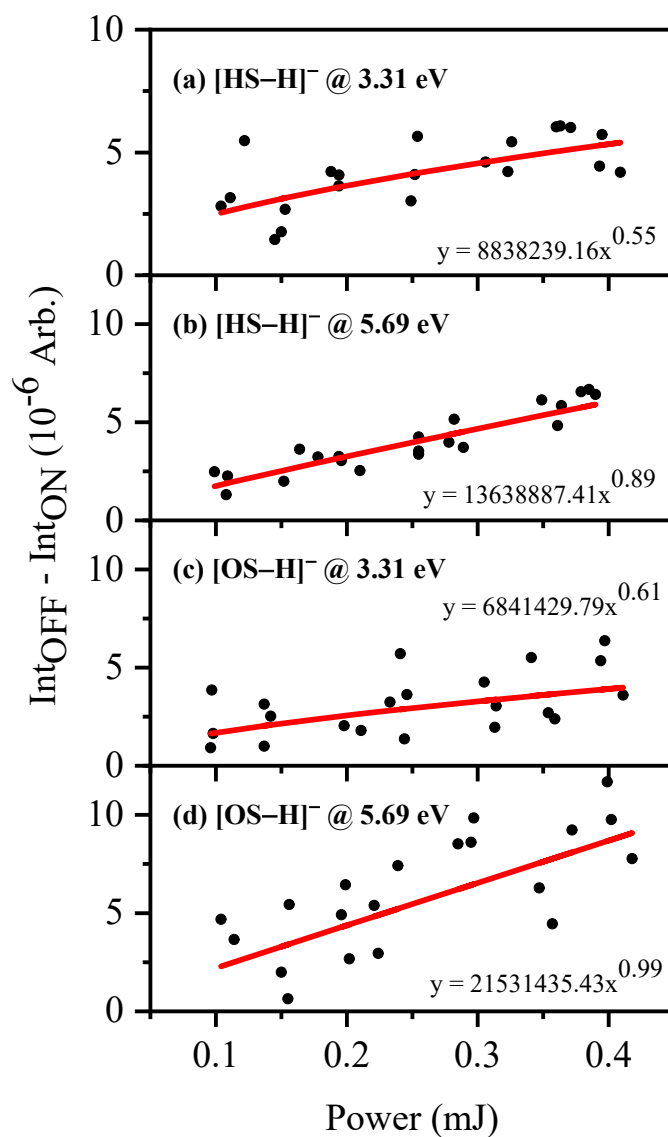

26

27 **Figure S1.** Power dependence measurements for  $[\text{HS-H}]^-$  at two absorption maxima of (a) 3.31 eV and  
 28 (b) 5.69 eV and  $[\text{OS-H}]^-$  at two absorption maxima of (c) 3.31 eV and (d) 5.69 eV.

29

30

31

32

### 33 S2. Optimized Cartesian Coordinate Tables

34 **Table S1.** Optimized Cartesian coordinates in Å and ground-state RI-MP2 energies,  $E_{\text{RI-MP2}}$ , in  
35 atomic units (a.u.) for the minimum-energy geometry of  $[\text{HS-H}]^-$  at the RI-MP2/*aug-cc-pVDZ*  
36 level.

---

|   |                                       |           |           |
|---|---------------------------------------|-----------|-----------|
|   | $E_{\text{RI-MP2}} = -845.7314898567$ |           |           |
| C | -1.970469                             | -2.648821 | -0.389568 |
| C | -2.426585                             | -3.717271 | 0.514986  |
| C | -3.368625                             | -4.649605 | -0.103317 |
| C | -3.804244                             | -4.552660 | -1.421412 |
| C | -3.338374                             | -3.504621 | -2.261655 |
| C | -2.435979                             | -2.578230 | -1.733613 |
| C | -1.021767                             | -1.637627 | 0.095399  |
| O | -0.520944                             | -1.538220 | 1.211892  |
| O | -0.702086                             | -0.704628 | -0.916454 |
| C | 0.218472                              | 0.352575  | -0.578746 |
| C | -0.325786                             | 1.311352  | 0.487810  |
| C | 0.603867                              | 2.526103  | 0.704728  |
| C | 2.033187                              | 2.019233  | 0.992213  |
| C | 2.581332                              | 1.057283  | -0.074520 |
| C | 1.626251                              | -0.138324 | -0.223013 |
| O | -2.070200                             | -3.865206 | 1.724938  |
| C | 0.596286                              | 3.464070  | -0.515886 |
| C | 0.101910                              | 3.319407  | 1.921023  |
| C | 3.994165                              | 0.587437  | 0.292480  |
| H | -3.728190                             | -5.458143 | 0.544863  |

---

---

|   |           |           |           |
|---|-----------|-----------|-----------|
| H | -4.514162 | -5.293976 | -1.812361 |
| H | -3.676545 | -3.421372 | -3.299610 |
| H | -2.068841 | -1.766760 | -2.367443 |
| H | 0.288956  | 0.898757  | -1.537317 |
| H | -0.430572 | 0.757412  | 1.433610  |
| H | -1.331692 | 1.656745  | 0.185094  |
| H | 0.947235  | 2.969002  | -1.433710 |
| H | -0.426629 | 3.833868  | -0.703629 |
| H | 1.248264  | 4.336945  | -0.332371 |
| H | 0.749461  | 4.193346  | 2.116168  |
| H | -0.926045 | 3.684419  | 1.750959  |
| H | 0.093739  | 2.684061  | 2.822203  |
| H | 2.022918  | 1.479711  | 1.960335  |
| H | 2.712804  | 2.886853  | 1.110968  |
| H | 2.639552  | 1.592312  | -1.042481 |
| H | 3.976277  | 0.047933  | 1.254885  |
| H | 4.394343  | -0.098558 | -0.472788 |
| H | 4.688591  | 1.440077  | 0.388722  |
| H | 1.589956  | -0.703110 | 0.722180  |
| H | 1.980169  | -0.821768 | -1.015563 |

---

37

38

39 **Table S2.** Optimized Cartesian coordinates in Å and ground-state RI-MP2 energies,  $E_{\text{RI-MP2}}$ , in  
40 atomic units (a.u.) for the minimum-energy geometry of [OS-H]<sup>-</sup> at the RI-MP2/*aug-cc-pVDZ*  
41 level.

---

|   |                                       |           |           |
|---|---------------------------------------|-----------|-----------|
|   | $E_{\text{RI-MP2}} = -807.7228143538$ |           |           |
| C | -0.488781                             | -1.236721 | 1.884044  |
| C | -0.981849                             | -0.135940 | 2.715850  |
| C | -0.601191                             | -0.254611 | 4.114936  |
| C | 0.194699                              | -1.289354 | 4.612190  |
| C | 0.688446                              | -2.308145 | 3.757393  |
| C | 0.349214                              | -2.255913 | 2.398813  |
| C | -0.843560                             | -1.250794 | 0.455421  |
| O | -1.894753                             | -0.890414 | -0.058459 |
| O | 0.224192                              | -1.729801 | -0.327500 |
| C | 0.153007                              | -1.361276 | -1.717314 |
| C | 0.971160                              | -0.078575 | -1.934565 |
| C | 0.372596                              | 1.113038  | -1.164599 |
| C | -0.993497                             | 1.602474  | -1.659474 |
| C | -1.634154                             | 2.576384  | -0.662964 |
| C | -3.024095                             | 3.036181  | -1.117892 |
| C | 2.440155                              | -0.274163 | -1.512964 |
| C | 3.146127                              | -1.461844 | -2.180667 |
| O | -1.644180                             | 0.862358  | 2.275329  |
| H | -0.965144                             | 0.535024  | 4.783523  |
| H | 0.442044                              | -1.309160 | 5.681901  |
| H | 1.315455                              | -3.116686 | 4.146500  |
| H | 0.713146                              | -3.028737 | 1.712788  |

---

---

|   |           |           |           |
|---|-----------|-----------|-----------|
| H | -0.897061 | -1.227161 | -2.017080 |
| H | 0.575826  | -2.204646 | -2.285826 |
| H | 0.938969  | 0.139696  | -3.023759 |
| H | 1.093039  | 1.952785  | -1.207955 |
| H | 0.290988  | 0.844413  | -0.095326 |
| H | -0.882161 | 2.080594  | -2.653900 |
| H | -1.673803 | 0.743638  | -1.778279 |
| H | -1.707820 | 2.069122  | 0.315678  |
| H | -0.974048 | 3.455142  | -0.532203 |
| H | -2.982838 | 3.540791  | -2.100302 |
| H | -3.698802 | 2.168531  | -1.208127 |
| H | -3.473538 | 3.736071  | -0.394132 |
| H | 2.987912  | 0.656505  | -1.747857 |
| H | 2.467831  | -0.395642 | -0.416659 |
| H | 4.223845  | -1.460253 | -1.947910 |
| H | 2.734489  | -2.420496 | -1.829583 |
| H | 3.038137  | -1.422413 | -3.279073 |

---

42

43

44 **Table S3.** Optimized Cartesian coordinates in Å and ground-state RI-MP2 energies,  $E_{\text{RI-MP2}}$ , in  
 45 atomic units (a.u.) for the minimum-energy geometry of [HS-H]<sup>•</sup> at the RI-MP2/*aug-cc-pVDZ*  
 46 level.

---

|   |                                       |           |           |
|---|---------------------------------------|-----------|-----------|
|   | $E_{\text{RI-MP2}} = -845.6055186348$ |           |           |
| C | -1.957017                             | -2.610520 | -0.586997 |
| C | -2.309721                             | -3.579262 | 0.352877  |
| C | -3.269448                             | -4.550367 | -0.000288 |
| C | -3.764914                             | -4.518921 | -1.257684 |
| C | -3.416044                             | -3.579052 | -2.220681 |
| C | -2.523821                             | -2.647459 | -1.852593 |
| C | -1.033200                             | -1.599847 | -0.077250 |
| O | -0.649600                             | -1.597786 | 1.100543  |
| O | -0.687710                             | -0.680165 | -1.014038 |
| C | 0.240124                              | 0.392507  | -0.633205 |
| C | -0.333509                             | 1.313610  | 0.443529  |
| C | 0.599021                              | 2.517304  | 0.712526  |
| C | 2.014662                              | 1.989629  | 1.029999  |
| C | 2.591245                              | 1.048633  | -0.041527 |
| C | 1.627103                              | -0.133060 | -0.263834 |
| O | -1.762572                             | -3.645742 | 1.501686  |
| C | 0.623212                              | 3.495656  | -0.473195 |
| C | 0.064337                              | 3.270781  | 1.941050  |
| C | 3.980952                              | 0.541813  | 0.361484  |
| H | -3.581965                             | -5.293478 | 0.733853  |
| H | -4.499066                             | -5.290370 | -1.522647 |
| H | -3.850458                             | -3.607056 | -3.218960 |

---



---

|   |           |           |           |
|---|-----------|-----------|-----------|
| H | -2.216507 | -1.867161 | -2.557460 |
| H | 0.310842  | 0.941773  | -1.584927 |
| H | -0.459862 | 0.742088  | 1.375626  |
| H | -1.329238 | 1.674027  | 0.125957  |
| H | 1.004596  | 3.044028  | -1.401077 |
| H | -0.393559 | 3.873963  | -0.674511 |
| H | 1.266389  | 4.360103  | -0.235352 |
| H | 0.709056  | 4.133794  | 2.180970  |
| H | -0.956403 | 3.647458  | 1.756290  |
| H | 0.031710  | 2.608729  | 2.822234  |
| H | 1.975010  | 1.435850  | 1.988444  |
| H | 2.697710  | 2.847362  | 1.181768  |
| H | 2.693242  | 1.606933  | -0.990836 |
| H | 3.921833  | -0.022568 | 1.307557  |
| H | 4.399671  | -0.126554 | -0.408784 |
| H | 4.682081  | 1.380209  | 0.505961  |
| H | 1.561410  | -0.726665 | 0.662393  |
| H | 2.000408  | -0.790220 | -1.068902 |

---

47

48

49 **Table S4.** Optimized Cartesian coordinates in Å and ground-state RI-MP2 energies,  $E_{\text{RI-MP2}}$ , in  
 50 atomic units (a.u.) for the minimum-energy geometry of [OS-H]<sup>•</sup> at the RI-MP2/*aug-cc-pVDZ*  
 51 level.

---

|   |                                       |           |           |
|---|---------------------------------------|-----------|-----------|
|   | $E_{\text{RI-MP2}} = -807.5631954953$ |           |           |
| C | -0.270937                             | -1.467071 | 2.038417  |
| C | 0.829165                              | -0.665919 | 2.629032  |
| C | 1.114231                              | -0.932844 | 4.053794  |
| C | 0.377310                              | -1.819886 | 4.774183  |
| C | -0.690586                             | -2.519775 | 4.165892  |
| C | -1.001393                             | -2.321174 | 2.800132  |
| C | -0.608072                             | -1.298839 | 0.585037  |
| O | -1.739685                             | -1.060981 | 0.182358  |
| O | 0.484382                              | -1.498792 | -0.173390 |
| C | 0.354557                              | -1.193151 | -1.599415 |
| C | 0.975652                              | 0.177148  | -1.872843 |
| C | 0.159706                              | 1.314155  | -1.234129 |
| C | -1.245672                             | 1.508083  | -1.812263 |
| C | -2.016141                             | 2.623657  | -1.096577 |
| C | -3.425448                             | 2.819707  | -1.667272 |
| C | 2.438879                              | 0.244076  | -1.394294 |
| C | 3.330248                              | -0.889461 | -1.917575 |
| O | 1.432884                              | 0.185486  | 2.003693  |
| H | 1.932934                              | -0.356688 | 4.490399  |
| H | 0.597049                              | -1.994022 | 5.830353  |
| H | -1.282627                             | -3.223348 | 4.754648  |
| H | -1.835353                             | -2.866786 | 2.350660  |

---

---

|   |           |           |           |
|---|-----------|-----------|-----------|
| H | -0.706140 | -1.240380 | -1.880681 |
| H | 0.901344  | -1.998477 | -2.107940 |
| H | 0.953355  | 0.296781  | -2.976144 |
| H | 0.730618  | 2.252975  | -1.358720 |
| H | 0.106022  | 1.142636  | -0.144064 |
| H | -1.170169 | 1.745241  | -2.890685 |
| H | -1.826070 | 0.574673  | -1.722861 |
| H | -2.080664 | 2.374322  | -0.022687 |
| H | -1.446893 | 3.567832  | -1.169424 |
| H | -3.381783 | 3.085708  | -2.736505 |
| H | -4.013886 | 1.892342  | -1.573199 |
| H | -3.968676 | 3.621081  | -1.141568 |
| H | 2.850306  | 1.214671  | -1.722125 |
| H | 2.441341  | 0.249871  | -0.292036 |
| H | 4.385632  | -0.702895 | -1.664179 |
| H | 3.054365  | -1.858494 | -1.472711 |
| H | 3.260214  | -0.981460 | -3.015310 |

---

52

53

54 **Table S5.** Optimized Cartesian coordinates in Å and ground-state RI-MP2 energies,  $E_{\text{RI-MP2}}$ , in  
 55 atomic units (a.u.) for the  $S_0 \leftarrow S_1$  MECP of [HS-H]<sup>-</sup> at the [RI-MP2/ADC(2)]/aug-cc-pVDZ level.

---

|   |                                       |           |           |
|---|---------------------------------------|-----------|-----------|
|   | $E_{\text{RI-MP2}} = -845.6116187640$ |           |           |
| C | -0.247887                             | -0.329960 | -0.522108 |
| C | -1.098084                             | -1.336540 | 0.127760  |
| C | -0.429837                             | -2.539406 | 0.616181  |
| C | 0.901318                              | -2.800290 | 0.345955  |
| C | 1.674069                              | -1.850590 | -0.400559 |
| C | 1.114852                              | -0.653836 | -0.823596 |
| C | -0.733272                             | 1.020127  | -0.755219 |
| O | -0.320778                             | 1.518535  | 0.497218  |
| O | -0.192683                             | 1.620909  | -1.960207 |
| C | -0.239078                             | 3.053554  | -1.928577 |
| C | -1.499893                             | 3.576705  | -1.224636 |
| C | -1.566756                             | 5.115903  | -1.143286 |
| C | -0.240530                             | 5.668924  | -0.585451 |
| C | 0.997219                              | 5.169308  | -1.340515 |
| C | 1.025513                              | 3.635969  | -1.283674 |
| O | -2.360401                             | -1.228464 | 0.230180  |
| C | -1.867618                             | 5.725662  | -2.523850 |
| C | -2.695585                             | 5.497644  | -0.174612 |
| C | 2.275211                              | 5.792037  | -0.766494 |
| H | -1.052372                             | -3.257199 | 1.160802  |
| H | 1.368759                              | -3.728718 | 0.694980  |
| H | 2.729990                              | -2.060428 | -0.606296 |
| H | 1.700591                              | 0.109487  | -1.343396 |

---

---

|   |           |          |           |
|---|-----------|----------|-----------|
| H | -0.254691 | 3.355580 | -2.995916 |
| H | -1.489216 | 3.148470 | -0.204092 |
| H | -2.399501 | 3.195877 | -1.741404 |
| H | -1.124755 | 5.430731 | -3.281009 |
| H | -2.857901 | 5.386551 | -2.873329 |
| H | -1.882733 | 6.829669 | -2.473369 |
| H | -2.768784 | 6.594670 | -0.061580 |
| H | -3.667940 | 5.117478 | -0.533496 |
| H | -2.503036 | 5.055718 | 0.816746  |
| H | -0.144623 | 5.351831 | 0.470842  |
| H | -0.274820 | 6.777232 | -0.591359 |
| H | 0.907999  | 5.485040 | -2.398602 |
| H | 2.422623  | 5.461428 | 0.275747  |
| H | 3.165272  | 5.495245 | -1.347764 |
| H | 2.216262  | 6.894930 | -0.773717 |
| H | 1.059533  | 3.277057 | -0.238524 |
| H | 1.912693  | 3.243156 | -1.815259 |

---

56

57

58 **Table S6.** Optimized Cartesian coordinates in Å and ground-state RI-MP2 energies,  $E_{\text{RI-MP2}}$ , in  
 59 atomic units (a.u.) for the  $S_0 \leftarrow S_1$  MECP of [OS-H]<sup>-</sup> at the [RI-MP2/ADC(2)]/aug-cc-pVDZ level.

---

|   |                                       |           |           |
|---|---------------------------------------|-----------|-----------|
|   | $E_{\text{RI-MP2}} = -807.5868736650$ |           |           |
| C | -0.440180                             | -1.036837 | 1.916487  |
| C | -0.995299                             | 0.064761  | 2.717543  |
| C | -0.686192                             | 0.078235  | 4.144023  |
| C | -0.030426                             | -0.972417 | 4.758997  |
| C | 0.381110                              | -2.095888 | 3.972885  |
| C | 0.182750                              | -2.130854 | 2.598461  |
| C | -0.409328                             | -0.955779 | 0.460228  |
| O | 0.766320                              | -0.204706 | 0.389170  |
| O | -0.415963                             | -2.290784 | -0.127205 |
| C | -0.062078                             | -2.289145 | -1.510803 |
| C | 1.466469                              | -2.325328 | -1.804031 |
| C | 2.026625                              | -0.948572 | -2.195571 |
| C | 1.613171                              | -0.513381 | -3.604500 |
| C | 2.185167                              | 0.853162  | -3.995149 |
| C | 1.854454                              | 1.228356  | -5.445176 |
| C | 2.240669                              | -2.920820 | -0.618142 |
| C | 1.827959                              | -4.362479 | -0.296187 |
| O | -1.765023                             | 0.956542  | 2.239895  |
| H | -1.042531                             | 0.944447  | 4.711655  |
| H | 0.169624                              | -0.957383 | 5.836019  |
| H | 0.885894                              | -2.933716 | 4.467385  |
| H | 0.524904                              | -2.975763 | 1.995811  |
| H | -0.527709                             | -1.413841 | -2.004280 |

---

---

|   |           |           |           |
|---|-----------|-----------|-----------|
| H | -0.535719 | -3.199209 | -1.924348 |
| H | 1.604456  | -3.003502 | -2.676192 |
| H | 3.133847  | -0.984649 | -2.155218 |
| H | 1.684741  | -0.223767 | -1.431912 |
| H | 1.951340  | -1.270561 | -4.341145 |
| H | 0.511366  | -0.473203 | -3.683635 |
| H | 1.789990  | 1.615366  | -3.301720 |
| H | 3.281347  | 0.837505  | -3.853992 |
| H | 2.262367  | 0.474085  | -6.140608 |
| H | 0.761914  | 1.265145  | -5.593606 |
| H | 2.272045  | 2.210003  | -5.726185 |
| H | 3.320914  | -2.890209 | -0.859505 |
| H | 2.071566  | -2.255290 | 0.244397  |
| H | 2.454542  | -4.794953 | 0.504004  |
| H | 0.776629  | -4.397353 | 0.031471  |
| H | 1.936082  | -5.006962 | -1.188033 |

---

60

61

62 **S3. Schematic Structure of the [HS-H]<sup>-</sup> and [OS-H]<sup>-</sup> Chromophore**

63

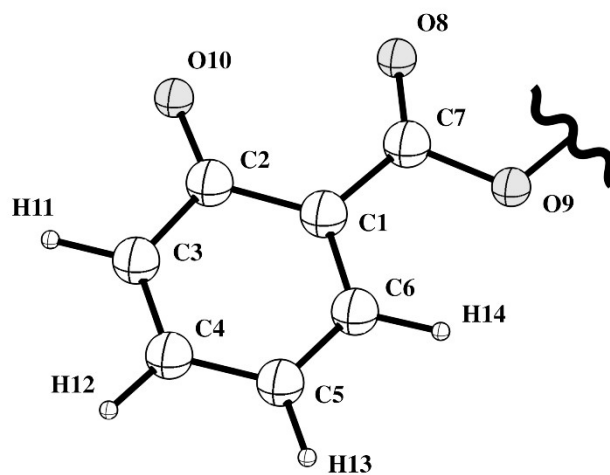

64

65 **Scheme S1.** Structure of the [HS-H]<sup>-</sup> and [OS-H]<sup>-</sup> chromophore. All atoms are labelled.
